# Supplementary material
Source: PubMed Central journal article supplement (PMC10086936)
Supplement: ajtr0015-2140-f7.pdf [file ajtr0015-2140-f7.pdf]

# IGFBPs in glioma

## Comparison of IGFBP1 Across 14 Analyses

Over-expression / Copy Number Gain

| Median Rank | p-Value | Gene   |   |   |   |   |   |   |   |   |   |    |    |    |    |    |
|-------------|---------|--------|---|---|---|---|---|---|---|---|---|----|----|----|----|----|
| 1148.5      | 0.020   | IGFBP1 |   |   |   |   |   |   |   |   |   |    |    |    |    |    |
|             |         |        | 1 | 2 | 3 | 4 | 5 | 6 | 7 | 8 | 9 | 10 | 11 | 12 | 13 | 14 |

### Legend

1. Anaplastic Astrocytoma vs. Normal *Beroukhim Brain, Proc Natl Acad Sci U S A, 2007*
2. Anaplastic Oligodendroglioma vs. Normal *Beroukhim Brain, Proc Natl Acad Sci U S A, 2007*
3. Primary Glioblastoma vs. Normal *Beroukhim Brain, Proc Natl Acad Sci U S A, 2007*
4. Secondary Glioblastoma vs. Normal *Beroukhim Brain, Proc Natl Acad Sci U S A, 2007*
5. Glioblastoma vs. Normal *Lee Brain, Cancer Cell, 2006*
6. Anaplastic Astrocytoma vs. Normal *Sun Brain, Cancer Cell, 2006*
7. Glioblastoma vs. Normal *Sun Brain, Cancer Cell, 2006*
8. Oligodendroglioma vs. Normal *Sun Brain, Cancer Cell, 2006*
9. Brain Glioblastoma vs. Normal *TCGA Brain, No Associated Paper, 2013*
10. Brain Astrocytoma vs. Normal *TCGA Brain 2, No Associated Paper, 2013*
11. Brain Glioblastoma vs. Normal *TCGA Brain 2, No Associated Paper, 2013*
12. Brain Oligodendroglioma vs. Normal *TCGA Brain 2, No Associated Paper, 2013*
13. Glioblastoma vs. Normal *TCGA Brain 2, No Associated Paper, 2013*
14. Oligoastrocytoma vs. Normal *TCGA Brain 2, No Associated Paper, 2013*

## Comparison of IGFBP3 Across 20 Analyses

Over-expression / Copy Number Gain

| Median Rank | p-Value | Gene   |   |   |   |   |   |   |   |   |   |    |    |    |    |    |    |    |    |    |    |    |
|-------------|---------|--------|---|---|---|---|---|---|---|---|---|----|----|----|----|----|----|----|----|----|----|----|
| 674.5       | 1.73E-8 | IGFBP3 |   |   |   |   |   |   |   |   |   |    |    |    |    |    |    |    |    |    |    |    |
|             |         |        | 1 | 2 | 3 | 4 | 5 | 6 | 7 | 8 | 9 | 10 | 11 | 12 | 13 | 14 | 15 | 16 | 17 | 18 | 19 | 20 |

### Legend

1. Anaplastic Astrocytoma vs. Normal *Beroukhim Brain, Proc Natl Acad Sci U S A, 2007*
2. Anaplastic Oligodendroglioma vs. Normal *Beroukhim Brain, Proc Natl Acad Sci U S A, 2007*
3. Primary Glioblastoma vs. Normal *Beroukhim Brain, Proc Natl Acad Sci U S A, 2007*
4. Secondary Glioblastoma vs. Normal *Beroukhim Brain, Proc Natl Acad Sci U S A, 2007*
5. Glioblastoma vs. Normal *Bredel Brain 2, Cancer Res, 2005*
6. Anaplastic Oligoastrocytoma vs. Normal *French Brain, Cancer Res, 2006*
7. Anaplastic Oligodendroglioma vs. Normal *French Brain, Cancer Res, 2006*
8. Pilocytic Astrocytoma vs. Normal *Gutmann Brain, Cancer Res, 2002*
9. Glioblastoma vs. Normal *Lee Brain, Cancer Cell, 2006*
10. Glioblastoma vs. Normal *Liang Brain, Proc Natl Acad Sci U S A, 2005*
11. Glioblastoma vs. Normal *Murat Brain, J Clin Oncol, 2008*
12. Astrocytoma vs. Normal *Rickman Brain, Cancer Res, 2001*
13. Glioblastoma vs. Normal *Shai Brain, Oncogene, 2003*
14. Glioblastoma vs. Normal *Sun Brain, Cancer Cell, 2006*
15. Brain Glioblastoma vs. Normal *TCGA Brain, No Associated Paper, 2013*
16. Brain Astrocytoma vs. Normal *TCGA Brain 2, No Associated Paper, 2013*
17. Brain Glioblastoma vs. Normal *TCGA Brain 2, No Associated Paper, 2013*
18. Brain Oligodendroglioma vs. Normal *TCGA Brain 2, No Associated Paper, 2013*
19. Glioblastoma vs. Normal *TCGA Brain 2, No Associated Paper, 2013*
20. Oligoastrocytoma vs. Normal *TCGA Brain 2, No Associated Paper, 2013*

## Comparison of IGFBP2 Across 16 Analyses

Over-expression / Copy Number Gain

| Median Rank | p-Value | Gene   |   |   |   |   |   |   |   |   |   |    |    |    |    |    |    |    |
|-------------|---------|--------|---|---|---|---|---|---|---|---|---|----|----|----|----|----|----|----|
| 434.0       | 0.006   | IGFBP2 |   |   |   |   |   |   |   |   |   |    |    |    |    |    |    |    |
|             |         |        | 1 | 2 | 3 | 4 | 5 | 6 | 7 | 8 | 9 | 10 | 11 | 12 | 13 | 14 | 15 | 16 |

### Legend

1. Anaplastic Oligodendroglioma vs. Normal *Beroukhim Brain, Proc Natl Acad Sci U S A, 2007*
2. Primary Glioblastoma vs. Normal *Beroukhim Brain, Proc Natl Acad Sci U S A, 2007*
3. Glioblastoma vs. Normal *Bredel Brain 2, Cancer Res, 2005*
4. Anaplastic Oligoastrocytoma vs. Normal *French Brain, Cancer Res, 2006*
5. Anaplastic Oligodendroglioma vs. Normal *French Brain, Cancer Res, 2006*
6. Pilocytic Astrocytoma vs. Normal *Gutmann Brain, Cancer Res, 2002*
7. Glioblastoma vs. Normal *Murat Brain, J Clin Oncol, 2008*
8. Classic Medulloblastoma vs. Normal *Pomeroy Brain, Nature, 2002*
9. Desmoplastic Medulloblastoma vs. Normal *Pomeroy Brain, Nature, 2002*
10. Astrocytoma vs. Normal *Rickman Brain, Cancer Res, 2001*
11. Glioblastoma vs. Normal *Shai Brain, Oncogene, 2003*
12. Anaplastic Astrocytoma vs. Normal *Sun Brain, Cancer Cell, 2006*
13. Glioblastoma vs. Normal *Sun Brain, Cancer Cell, 2006*
14. Brain Glioblastoma vs. Normal *TCGA Brain, No Associated Paper, 2013*
15. Brain Glioblastoma vs. Normal *TCGA Brain 2, No Associated Paper, 2013*
16. Meningioma vs. Normal *Watson Brain, Am J Pathol, 2002*

## Comparison of IGFBP4 Across 10 Analyses

Over-expression / Copy Number Gain

| Median Rank | p-Value | Gene   |   |   |   |   |   |   |   |   |   |    |
|-------------|---------|--------|---|---|---|---|---|---|---|---|---|----|
| 774.5       | 1.15E-6 | IGFBP4 |   |   |   |   |   |   |   |   |   |    |
|             |         |        | 1 | 2 | 3 | 4 | 5 | 6 | 7 | 8 | 9 | 10 |

### Legend

1. Anaplastic Oligodendroglioma vs. Normal *French Brain, Cancer Res, 2006*
2. Pilocytic Astrocytoma vs. Normal *Gutmann Brain, Cancer Res, 2002*
3. Glioblastoma vs. Normal *Lee Brain, Cancer Cell, 2006*
4. Astrocytoma vs. Normal *Rickman Brain, Cancer Res, 2001*
5. Glioblastoma vs. Normal *Shai Brain, Oncogene, 2003*
6. Glioblastoma vs. Normal *Sun Brain, Cancer Cell, 2006*
7. Brain Glioblastoma vs. Normal *TCGA Brain, No Associated Paper, 2013*
8. Glioblastoma vs. Normal *TCGA Brain, No Associated Paper, 2013*
9. Brain Oligodendroglioma vs. Normal *TCGA Brain 2, No Associated Paper, 2013*
10. Oligoastrocytoma vs. Normal *TCGA Brain 2, No Associated Paper, 2013*



## IGFBPs in glioma

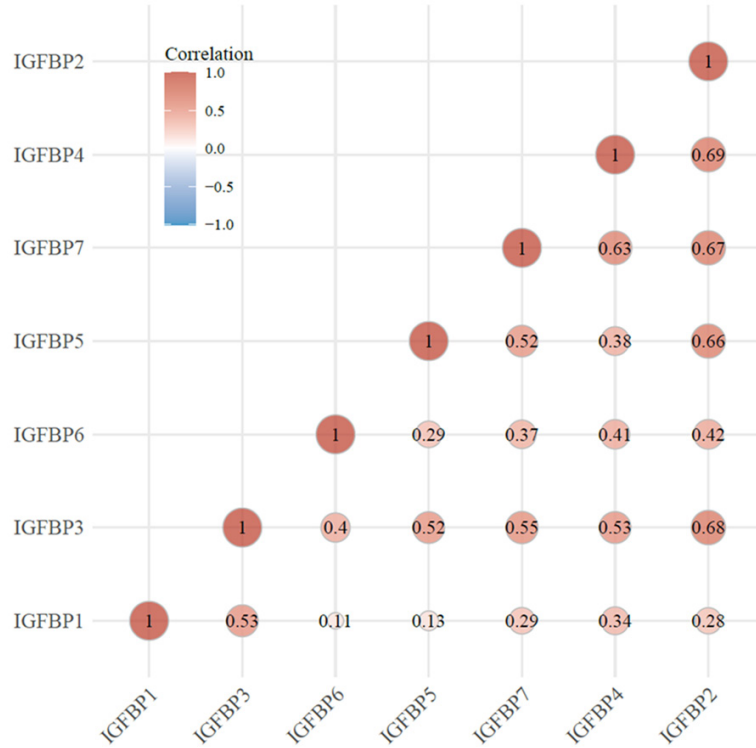

**Supplementary Figure 2.** mRNA expression correlations of IGFBPs in glioma. TCGA (LGG+GBM) mRNA expression cohorts were analyzed.

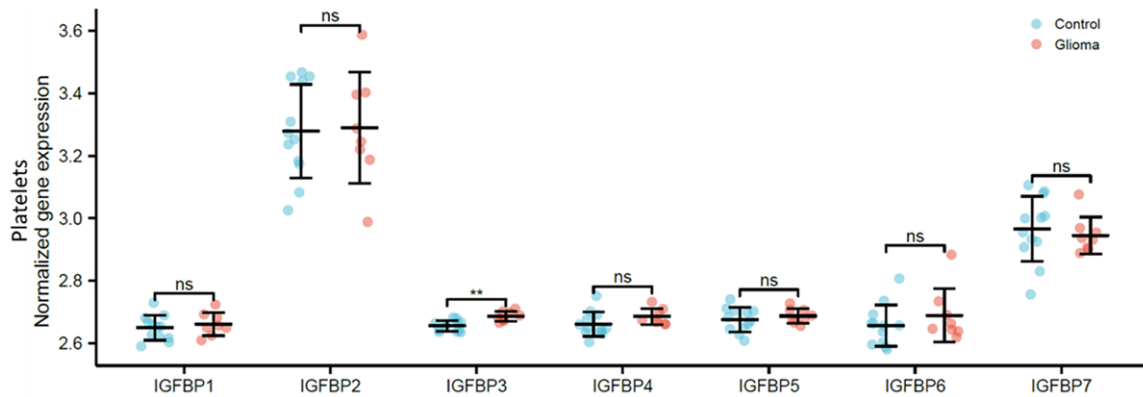

**Supplementary Figure 3.** Expression of IGFBPs in platelets from glioma patients or healthy donors. GSE31095 cohort was analyzed.

# IGFBPs in glioma

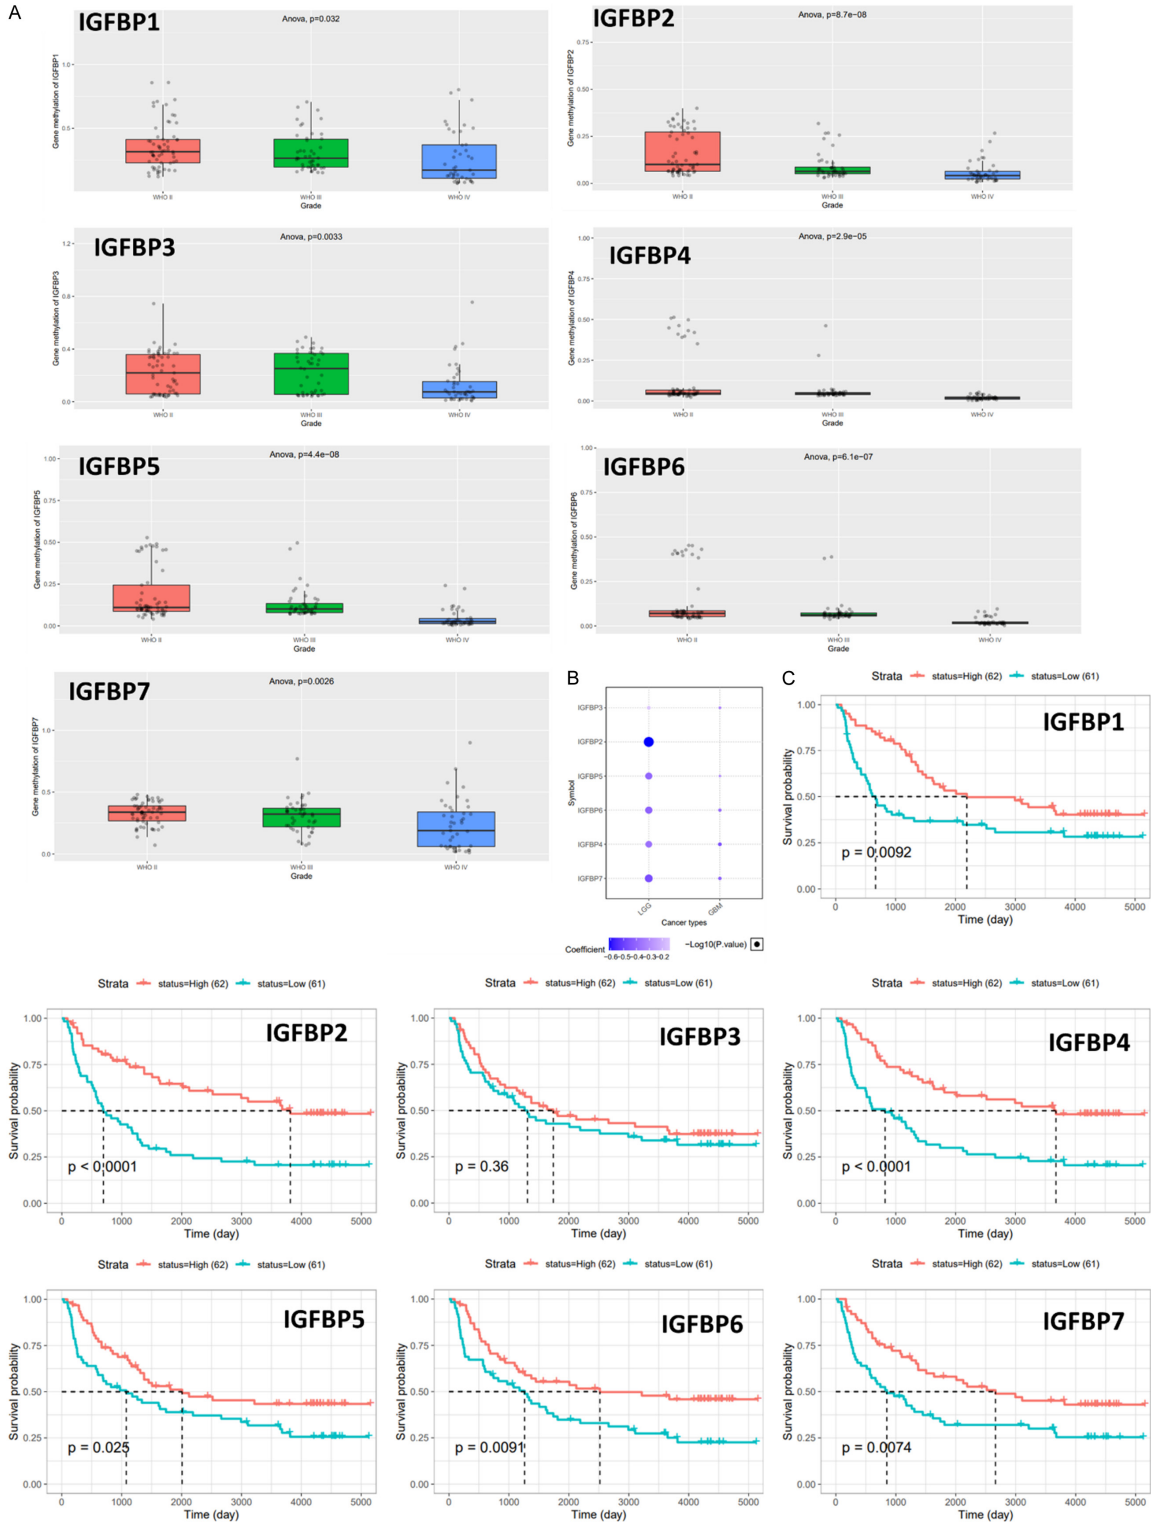

**Supplementary Figure 4.** Methylation of IGFBPs in glioma. CGGA Methyl\_159 cohort was analyzed. A. Methylation levels of IGFBPs in different grades of glioma (grade 2-4). B. Correlation of methylation and IGFBP mRNA expression. C. Overall survival KM plots and log-rank analysis of glioma with different methylation of IGFBPs.



# IGFBPs in glioma

A

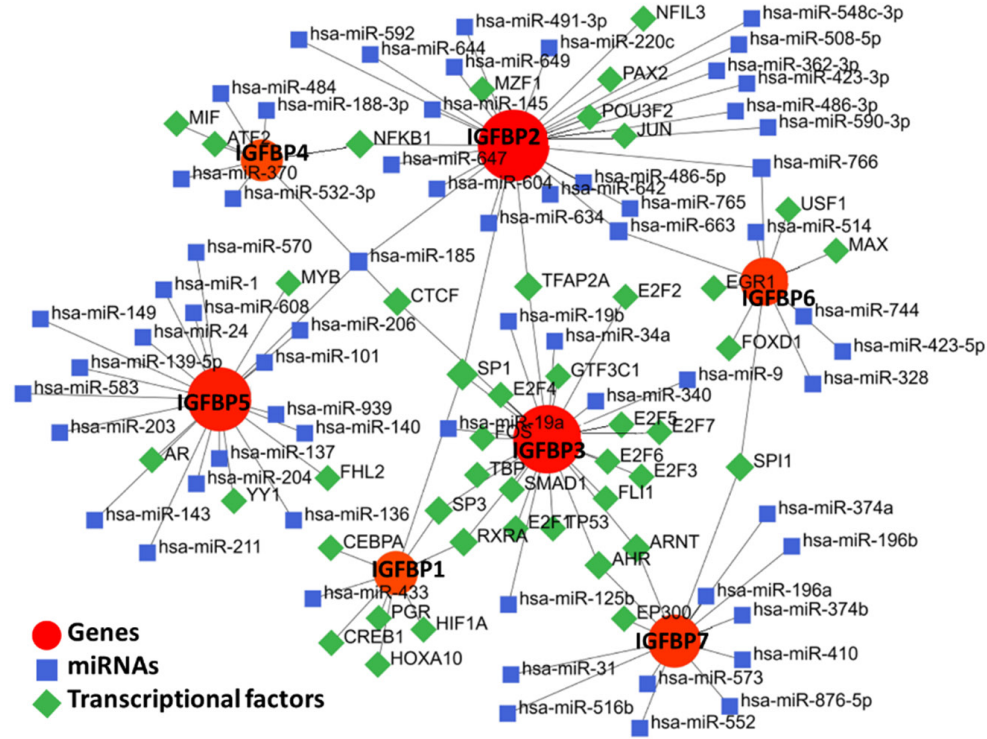

B

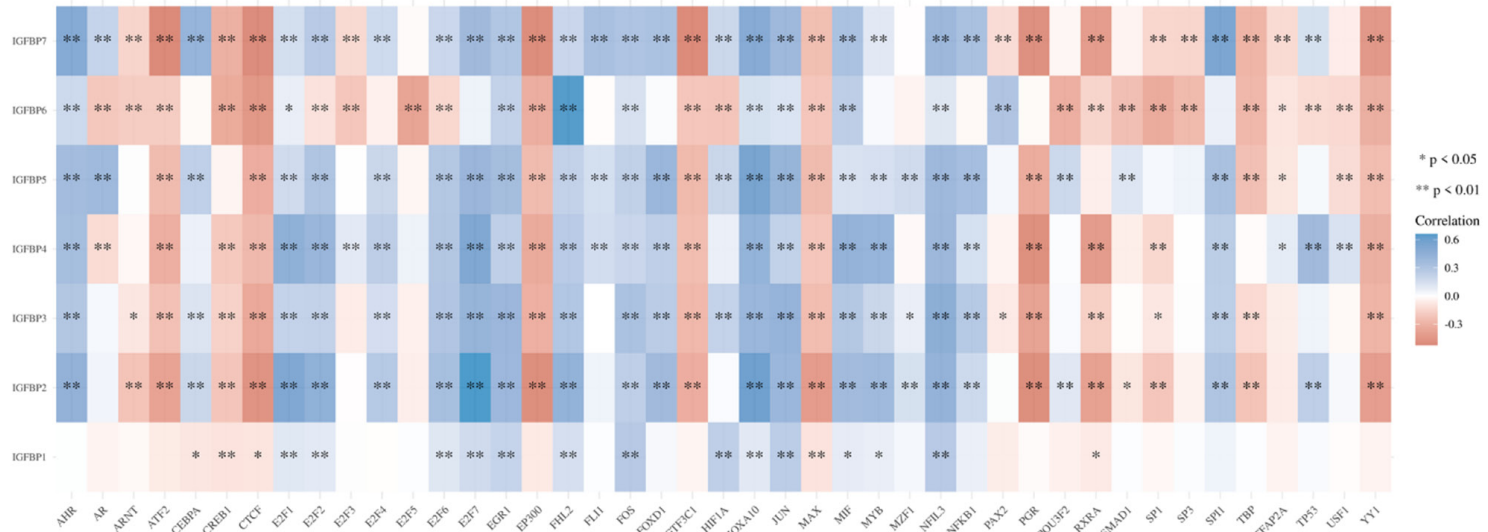

## IGFBPs in glioma

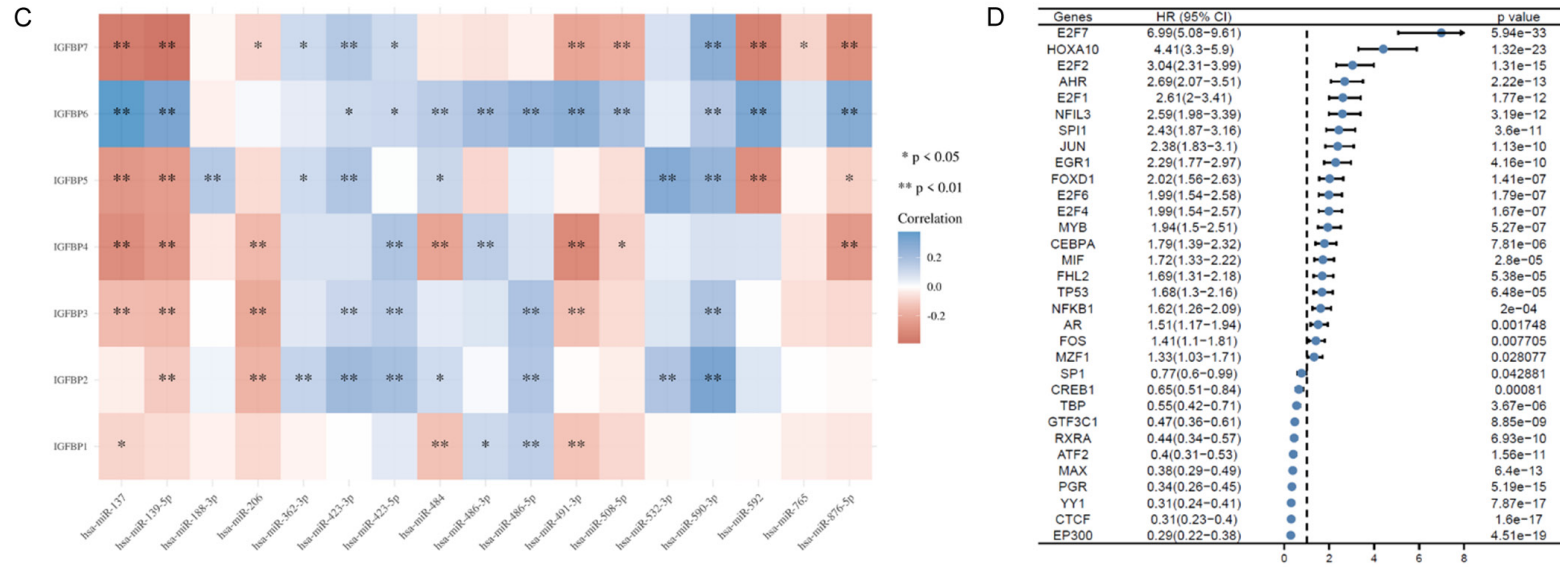

**Supplementary Figure 5.** Regulation of IGFBP expression. TCGA (LGG+GBM) RNA expression cohort was analyzed. A. Gene-miRNA-transcriptional factor coregulation network of IGFBPs constructed by RegNetwork. B. Correlation of IGFBPs and transcriptional factor mRNA expression. C. Correlation of IGFBPs and miRNA expression. Genes that were not detected in the cohort were excluded. D. Transcriptional factors for IGFBP associated with the survival of glioma patients.

## IGFBPs in glioma

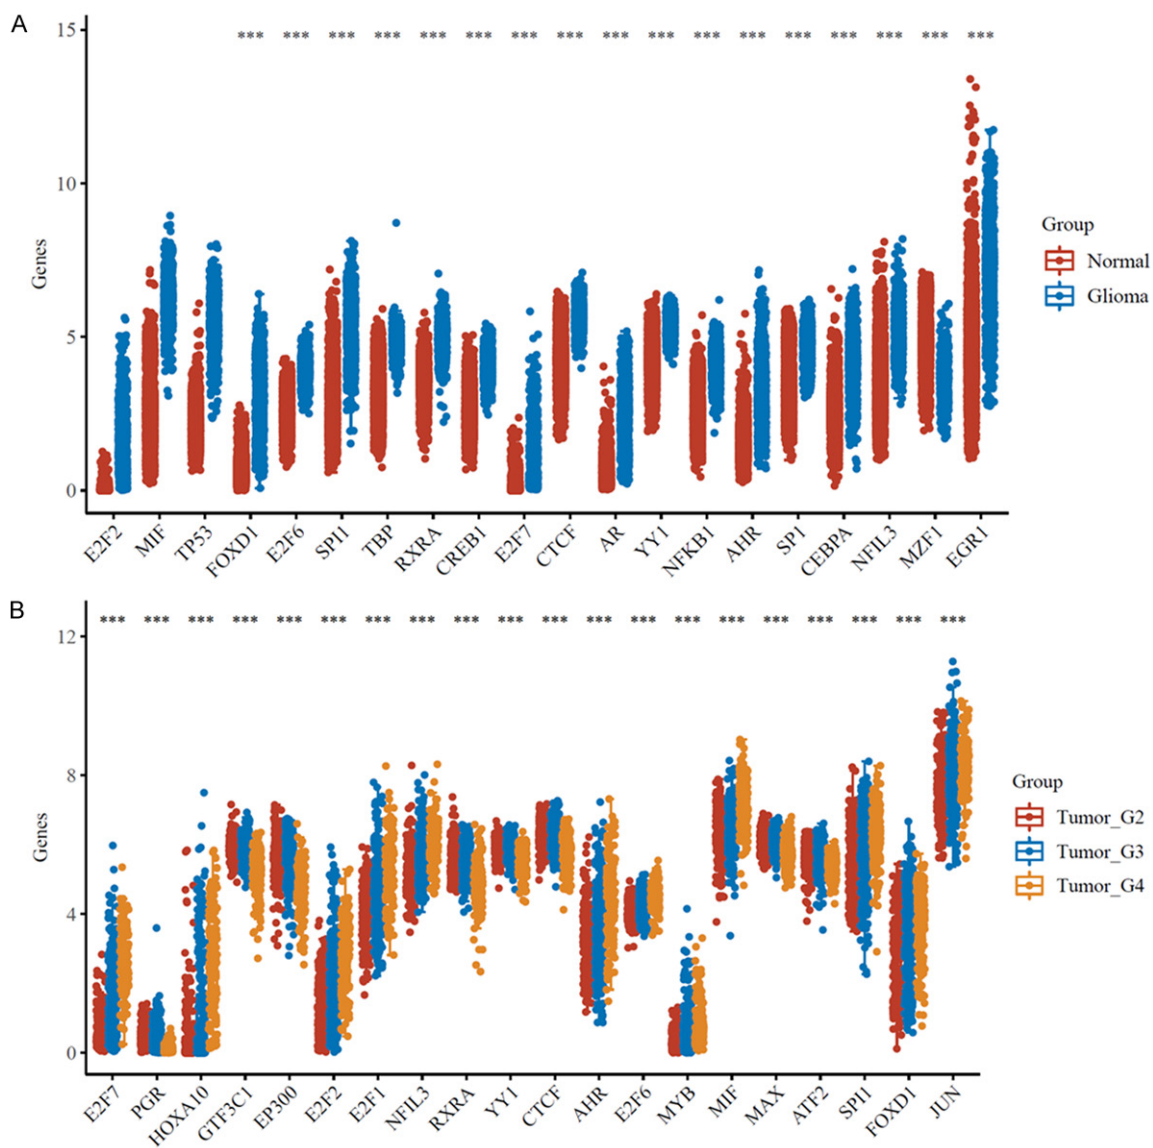

**Supplementary Figure 6.** Expression of transcription factors of IGFBP associated with the survival of glioma patients. TCGA (LGG+GBM) mRNA expression cohort was analyzed. A. Expression of IGFBPs in glioma and normal brain tissues. B. Expression of transcription factors of IGFBPs associated with survival of glioma patients in grade 2-4 glioma (G2-4).

# IGFBPs in glioma

A

**TCGA (LGG+BGM)  
Overall survival  
Log-rank analysis**

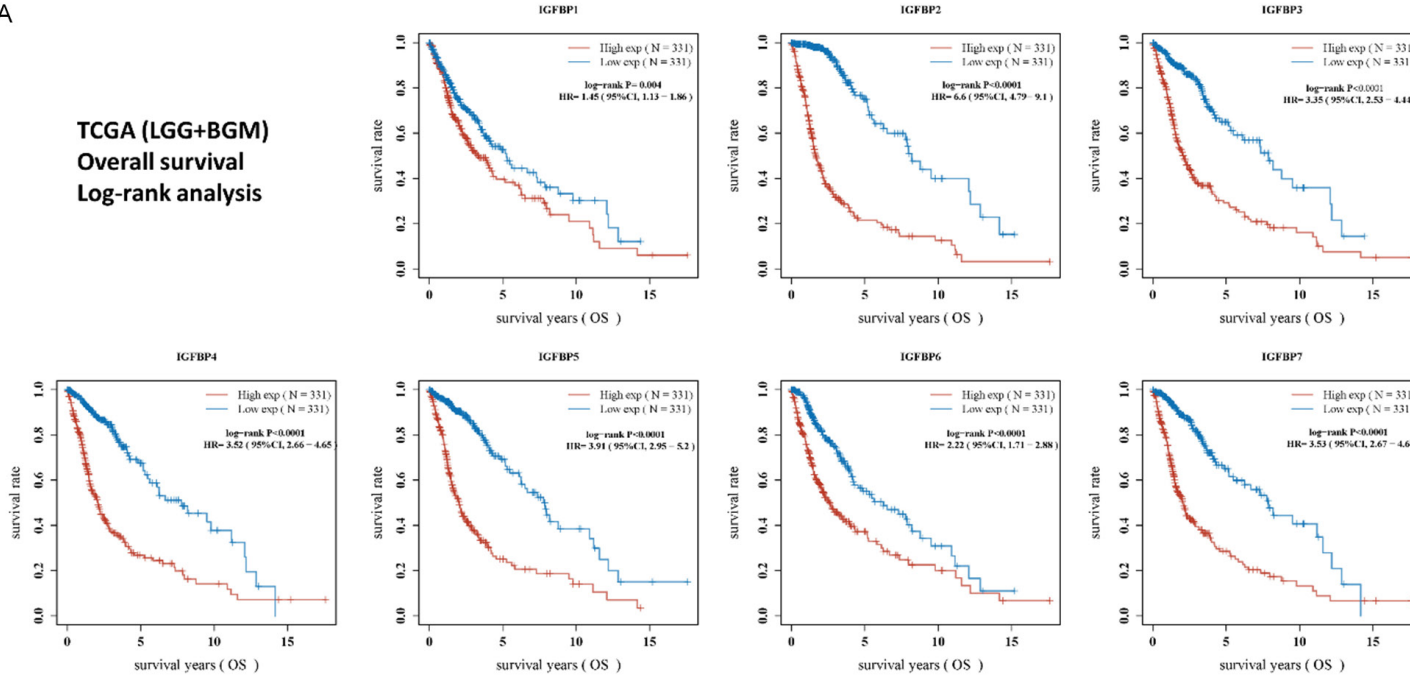

B

**External validation  
mRNAseq\_325\_primary  
Overall survival  
Log-rank analysis**

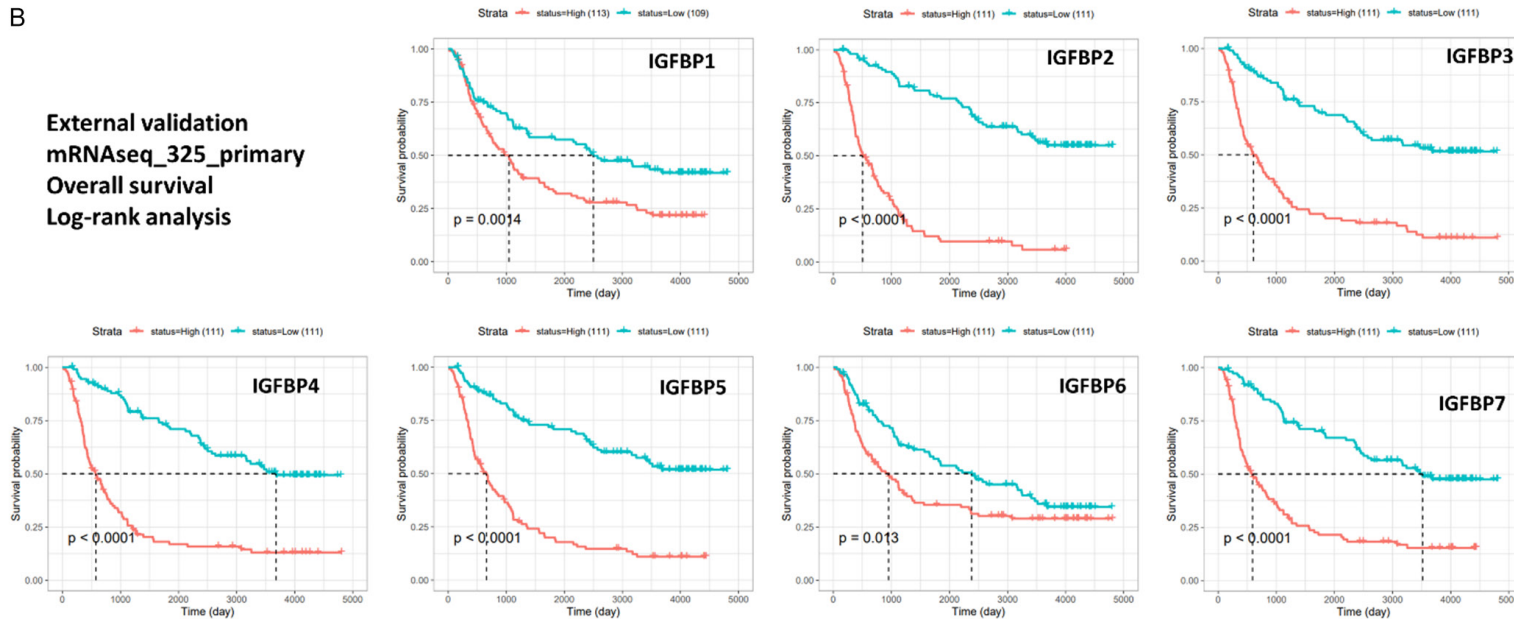



## IGFBPs in glioma

C

**TCGA (LGG+BGM)  
Overall survival  
Time-dependent ROC analysis**

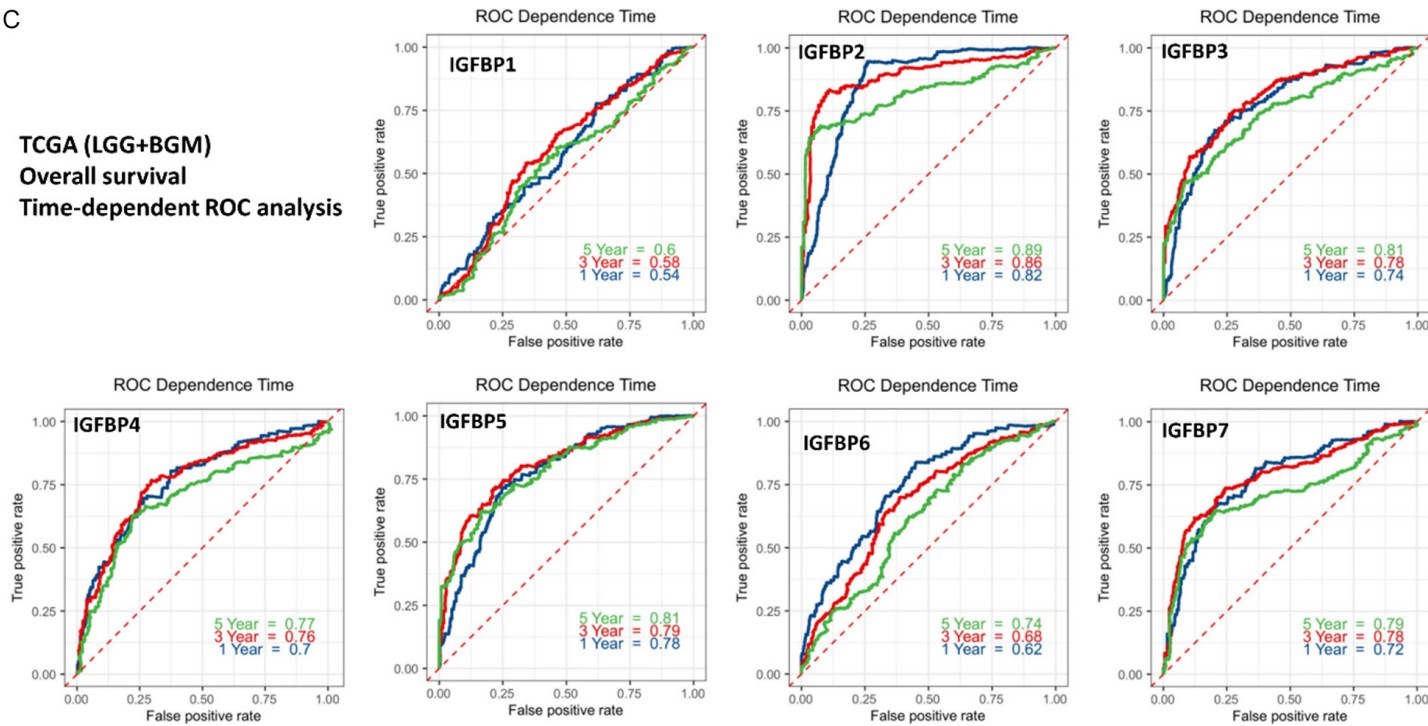

**Supplementary Figure 7.** Prognostic value of IGFBPs for glioma. A. Overall survival K-M plots and log-rank analysis of IGFBPs in glioma. TCGA (LGG+GBM) mRNA expression cohort was analyzed. B. Overall survival K-M plots and log-rank validation of IGFBPs in glioma. CGGA mRNAseq\_325\_primary mRNA expression cohort was analyzed to validate the prognostic value of IGFBPs for glioma. C. Overall survival time-dependent ROC curve of IGFBPs for glioma patients. TCGA (LGG+GBM) mRNA expression cohort was analyzed.

# IGFBPs in glioma

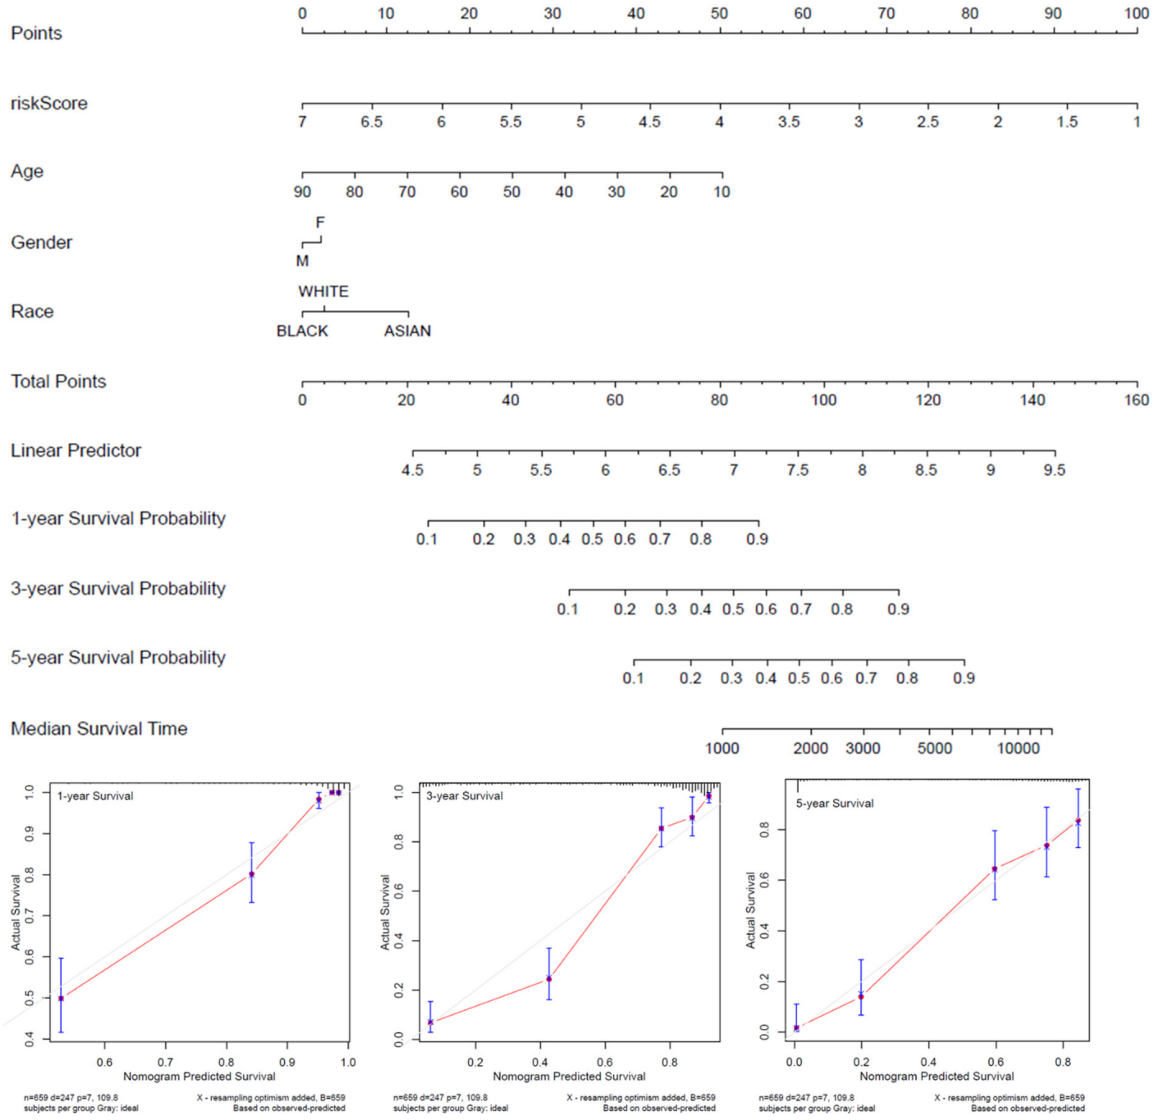

**Supplementary Figure 8.** Prognostic nomogram and calibration curves based on the LASSO regression model. TCGA (LGG+GBM) mRNA expression cohort was used to calibrate the model.

# IGFBPs in glioma

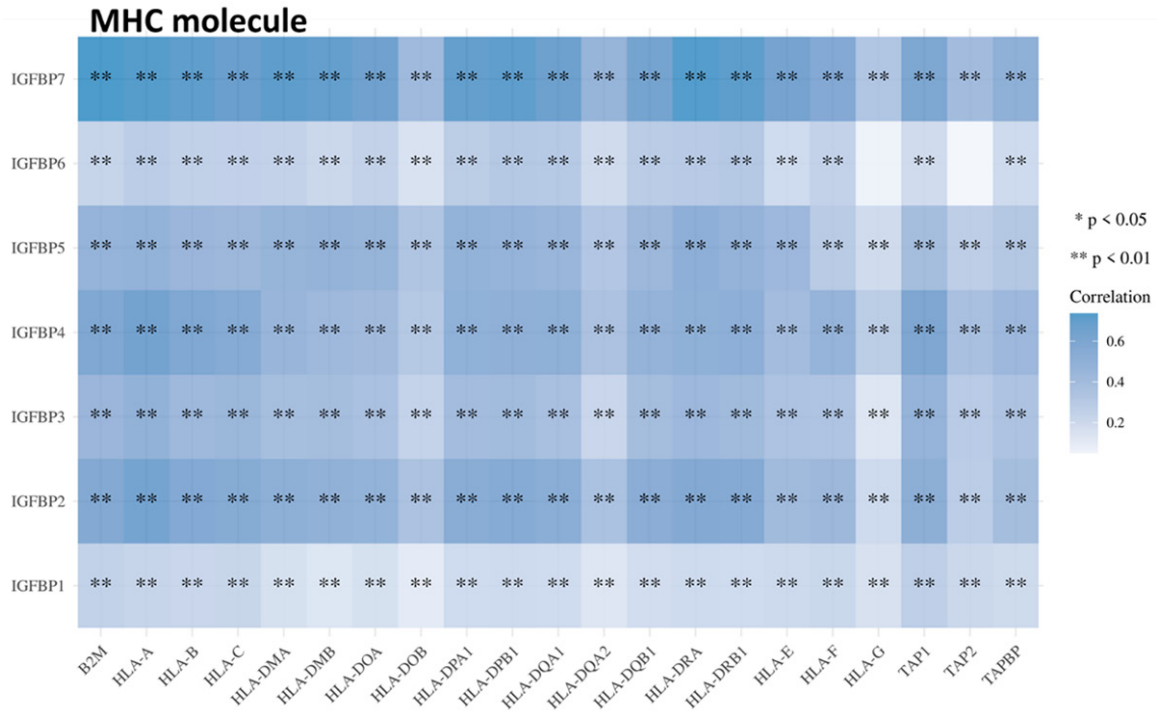

**Supplementary Figure 9.** Correlations of expression of MHC molecule and expression of IGFBPs. TCGA (LGG+GBM) mRNA expression cohort was analyzed.

## IGFBPs in glioma

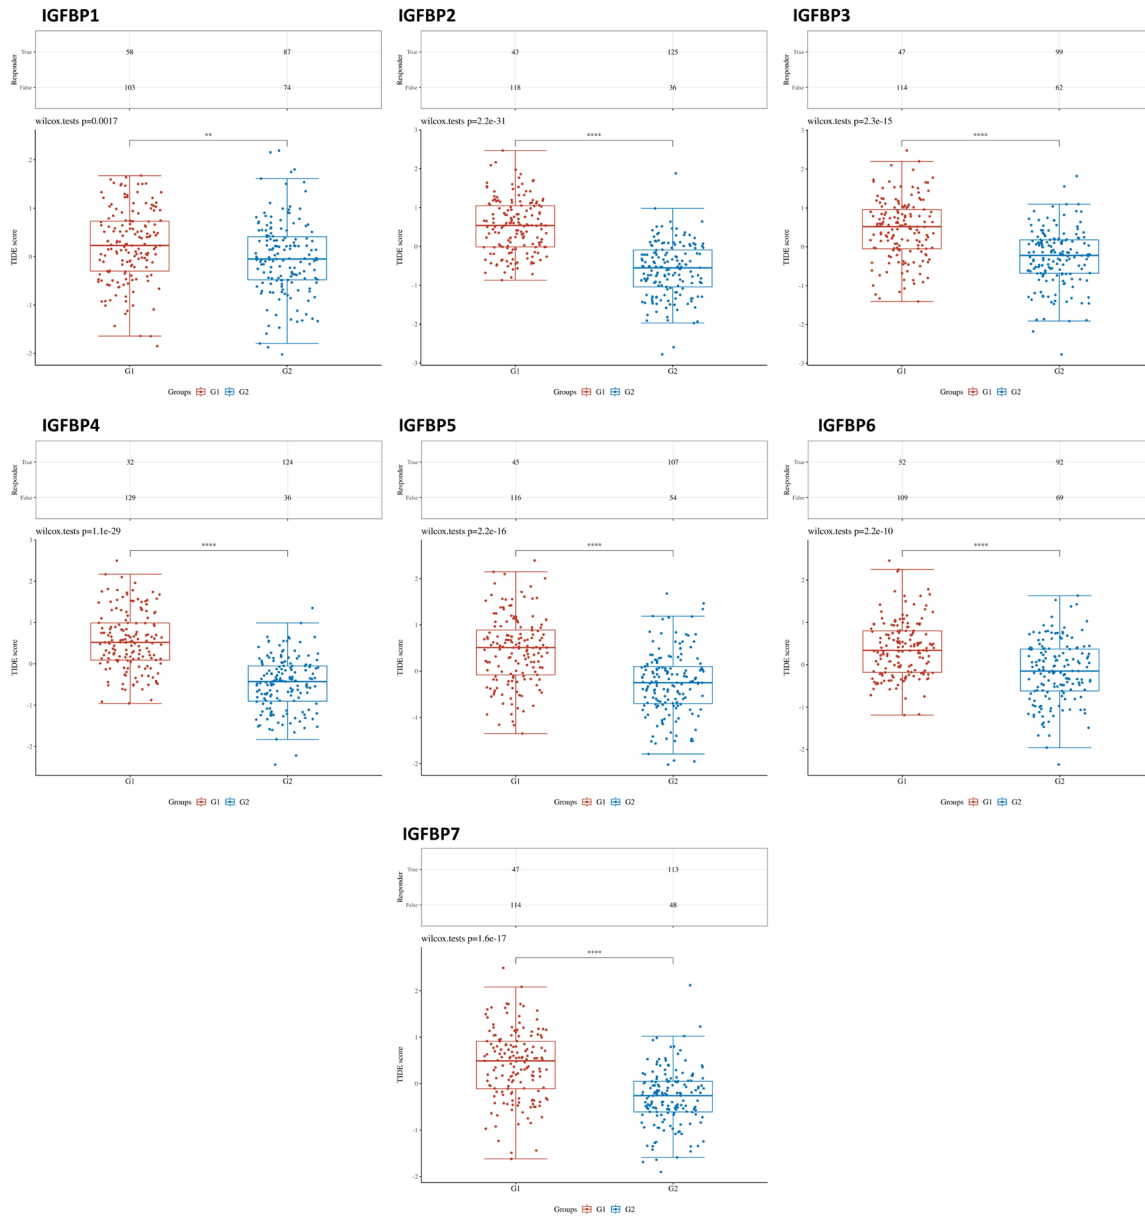

**Supplementary Figure 10.** Predictive value of IGFBPs for immune therapy. TCGA (LGG+GBM) mRNA expression cohort was analyzed. IGFBP high (G1, 75-100%) and low (G2, 0-25%) groups were compared. The Immune checkpoint blockade (ICB) response was predicted using the Tumor Immune Dysfunction and Exclusion (TIDE) algorithm.

# IGFBPs in glioma

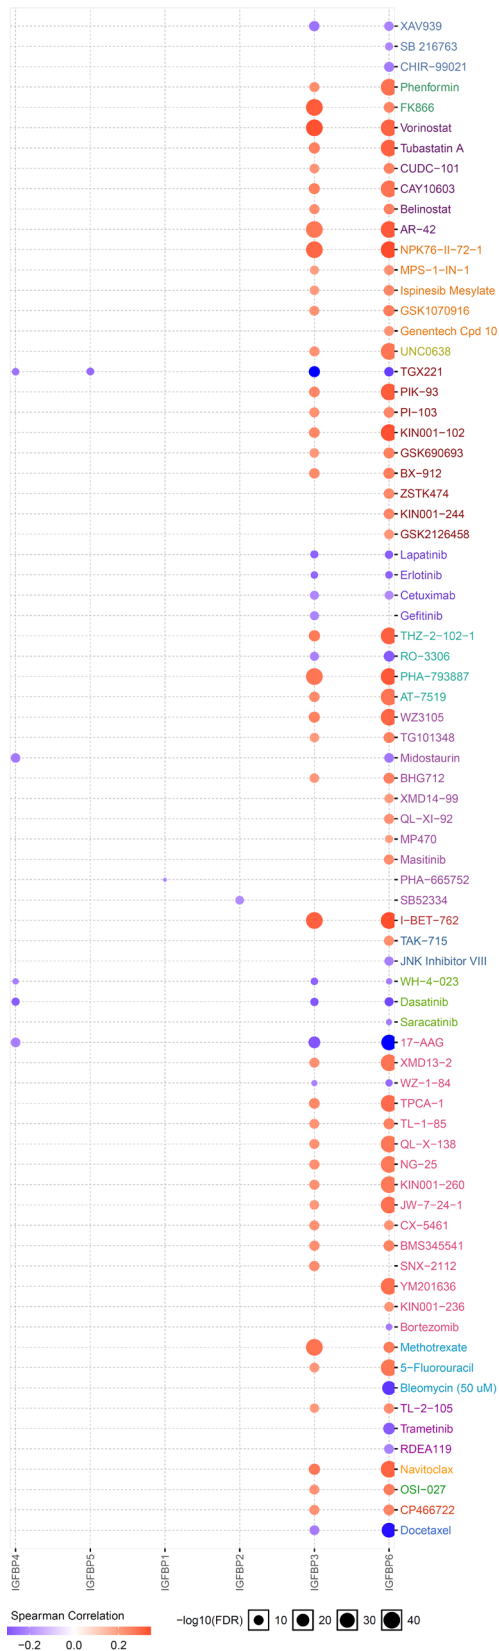

**Supplementary Figure 11.** Predictive value of IGFBPs for GDSC drug therapy in cancers. The GSCALite was used to evaluate the area under the dose-response curve (AUC) values for drugs and gene expression profiles of IGFBPs in different cancer cell lines. Drug sensitivity and gene expression profiling data of cancer cell lines in GDSC are integrated for investigation. The expression of each gene in the gene set was assessed by Spearman correlation analysis with the small molecule/drug sensitivity (IC50).



# IGFBPs in glioma

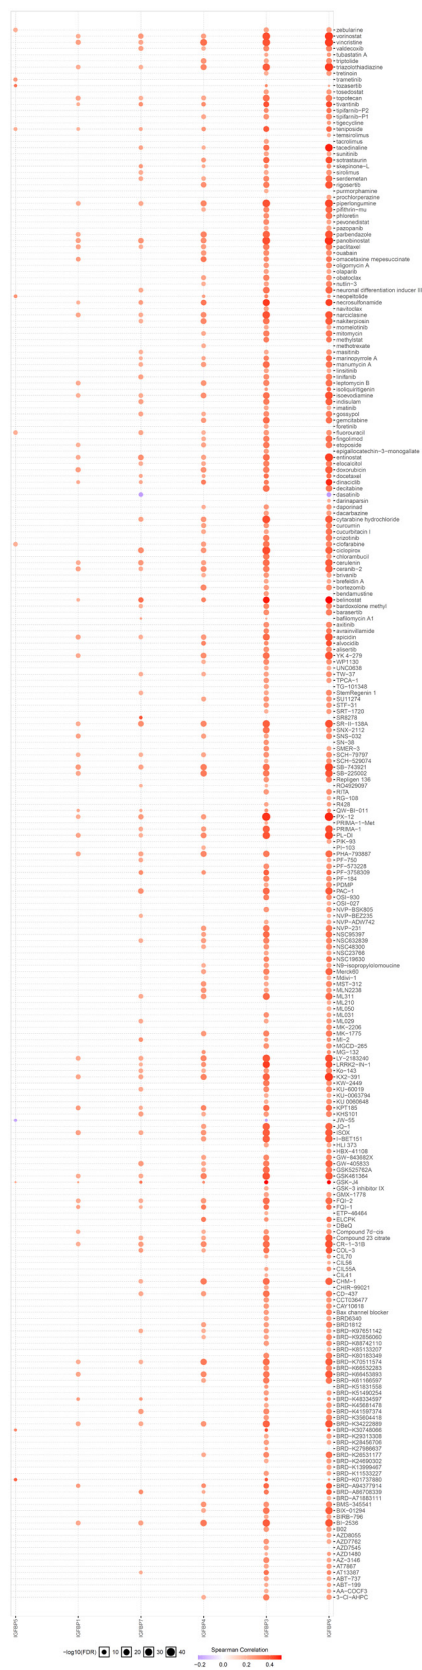

**Supplementary Figure 12.** Predictive value of IGFBPs for CTRP drug therapy in cancers. The GSCALite was used to evaluate the area under the dose-response curve (AUC) values for drugs and gene expression profiles of IGFBPs in different cancer cell lines. Drug sensitivity and gene expression profiling data of cancer cell lines in CTRP are integrated for investigation. The expression of each gene in the gene set was assessed by Spearman correlation analysis with the small molecule/drug sensitivity (IC50).

## IGFBPs in glioma

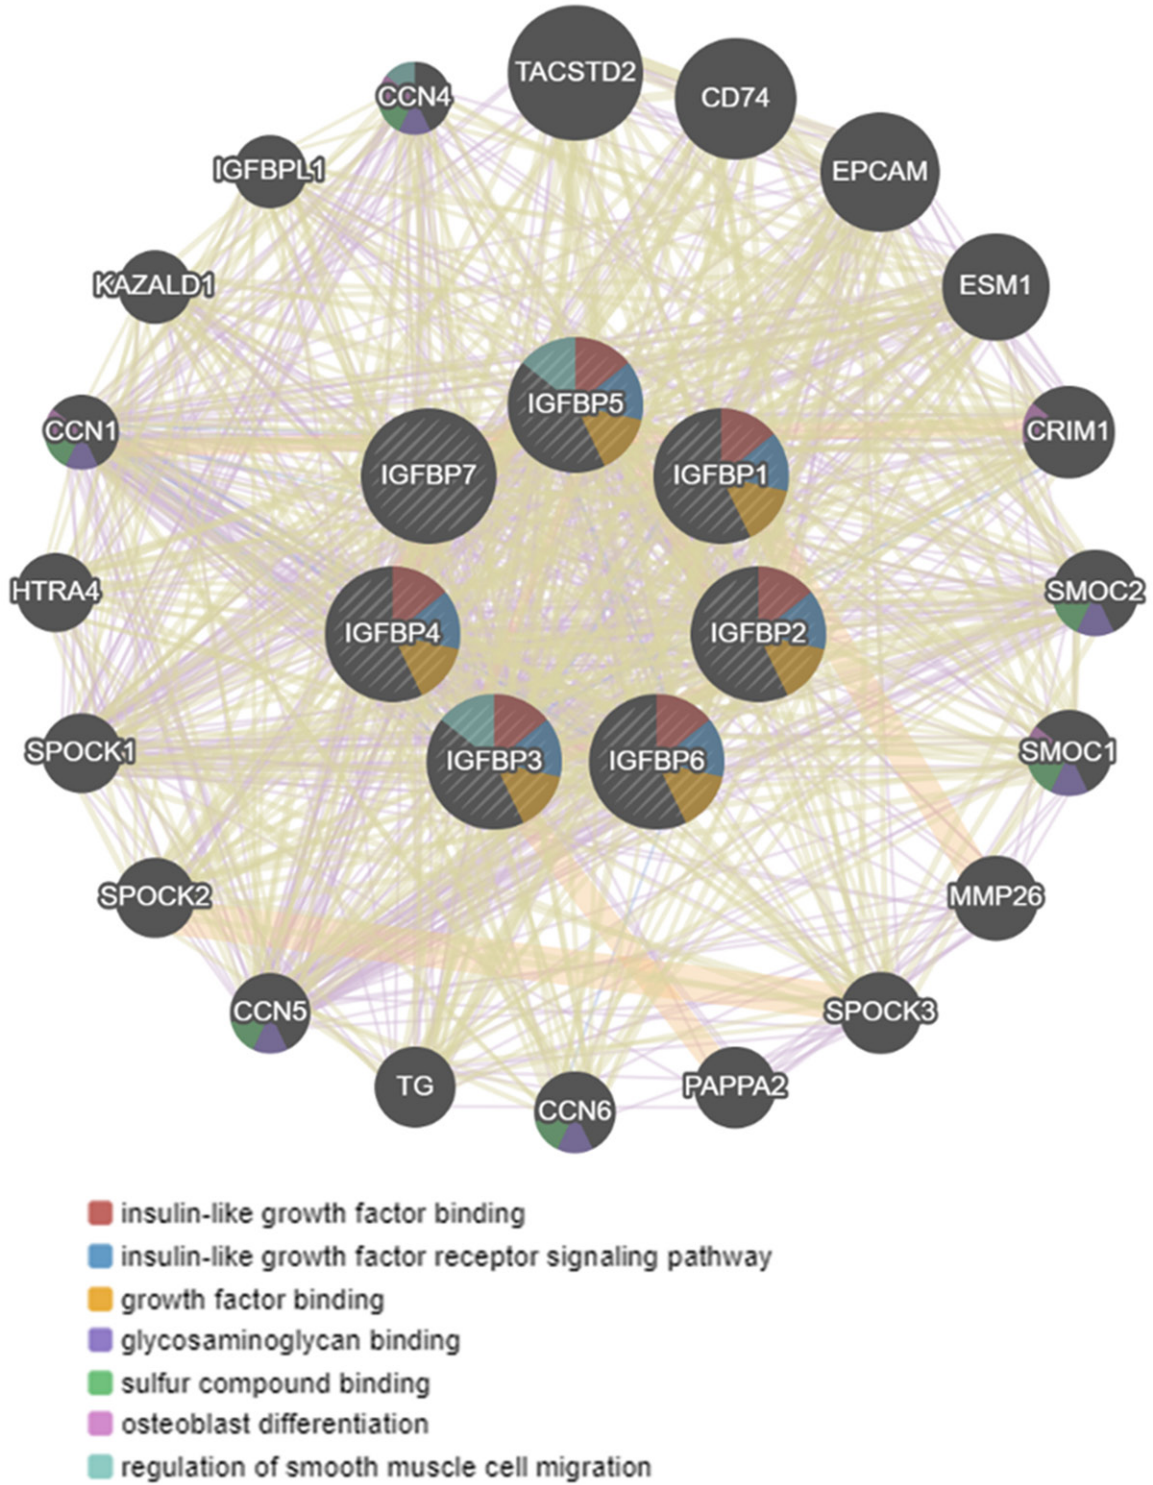

Supplementary Figure 13. Functional prediction of IGFBP mRNA expression and gene interaction network by the GeneMANIA.

## IGFBPs in glioma

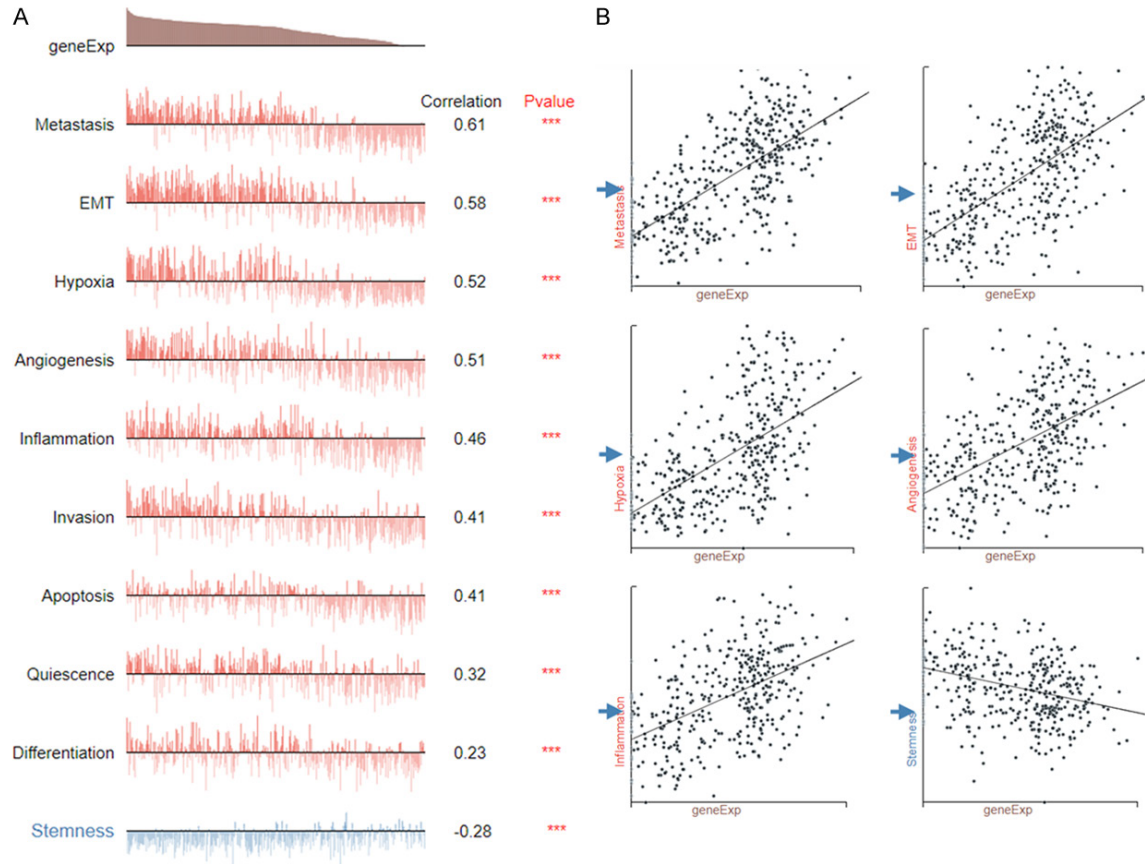

**Supplementary Figure 14.** Correlations between IGFBP expression and functional states in a glioma single-cell dataset. The GSE84465 cohort (n=991) was accessed and analyzed using the CancerSEA. IGFBP1-7 genes were analyzed as a single signature. A. Significant correlations with an  $|R| > 0.2$ . B. Representative scatter plot of the correlations. Grey points were not considered to compute the correlations. \*\*\* $P < 0.001$ .

# IGFBPs in glioma

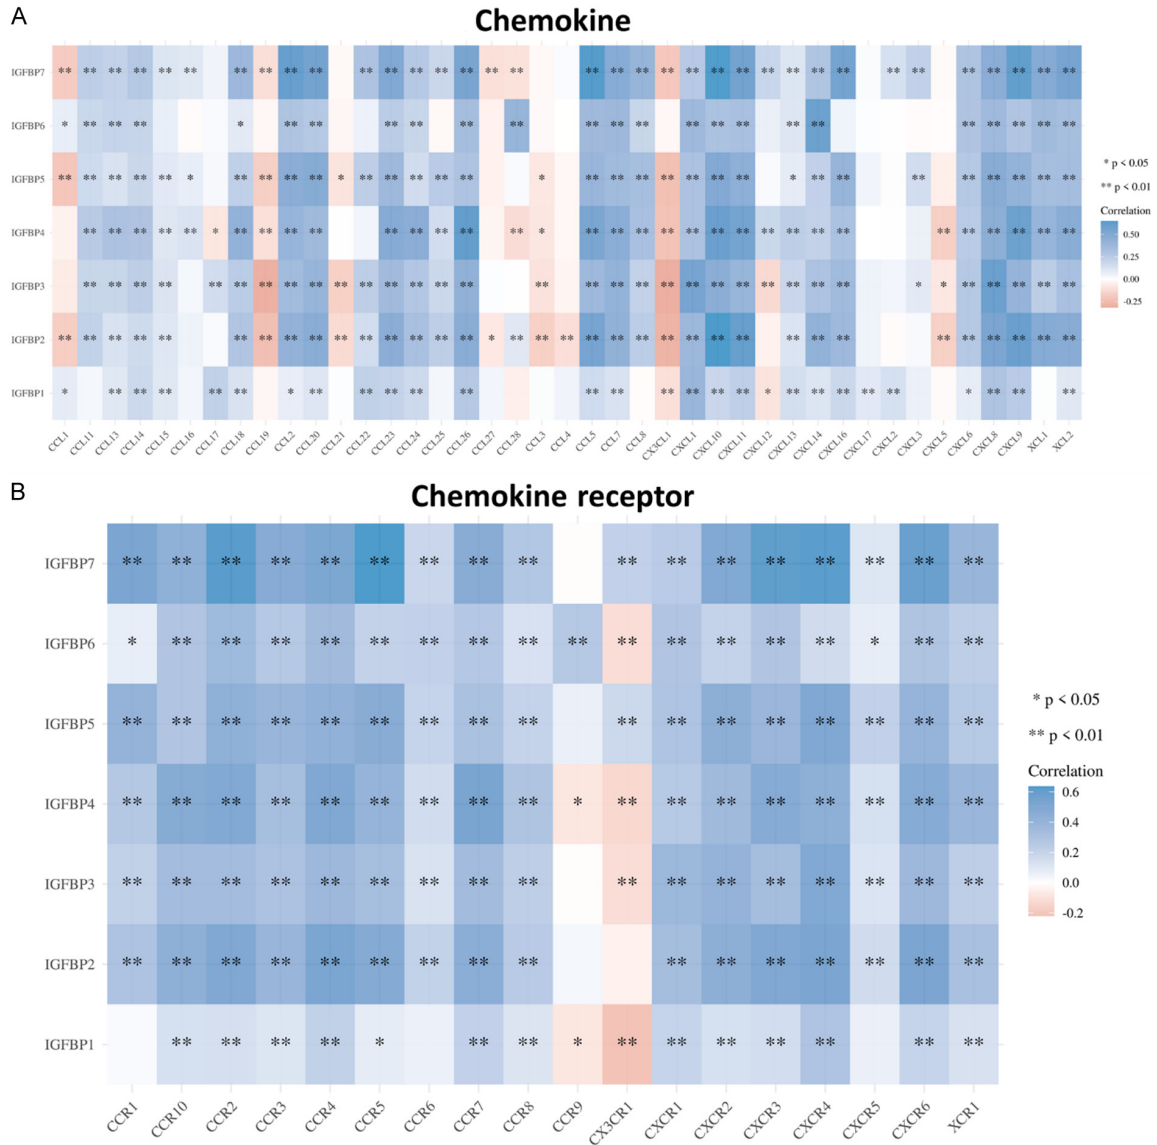

**Supplementary Figure 15.** Chemokine association of IGFBPs in glioma. TCGA (LGG+GBM) mRNA expression cohort was analyzed. A. Correlations of chemokine expressions and expressions of IGFBPs. B. Correlations of chemokine receptor expressions and expressions of IGFBPs.

## IGFBPs in glioma

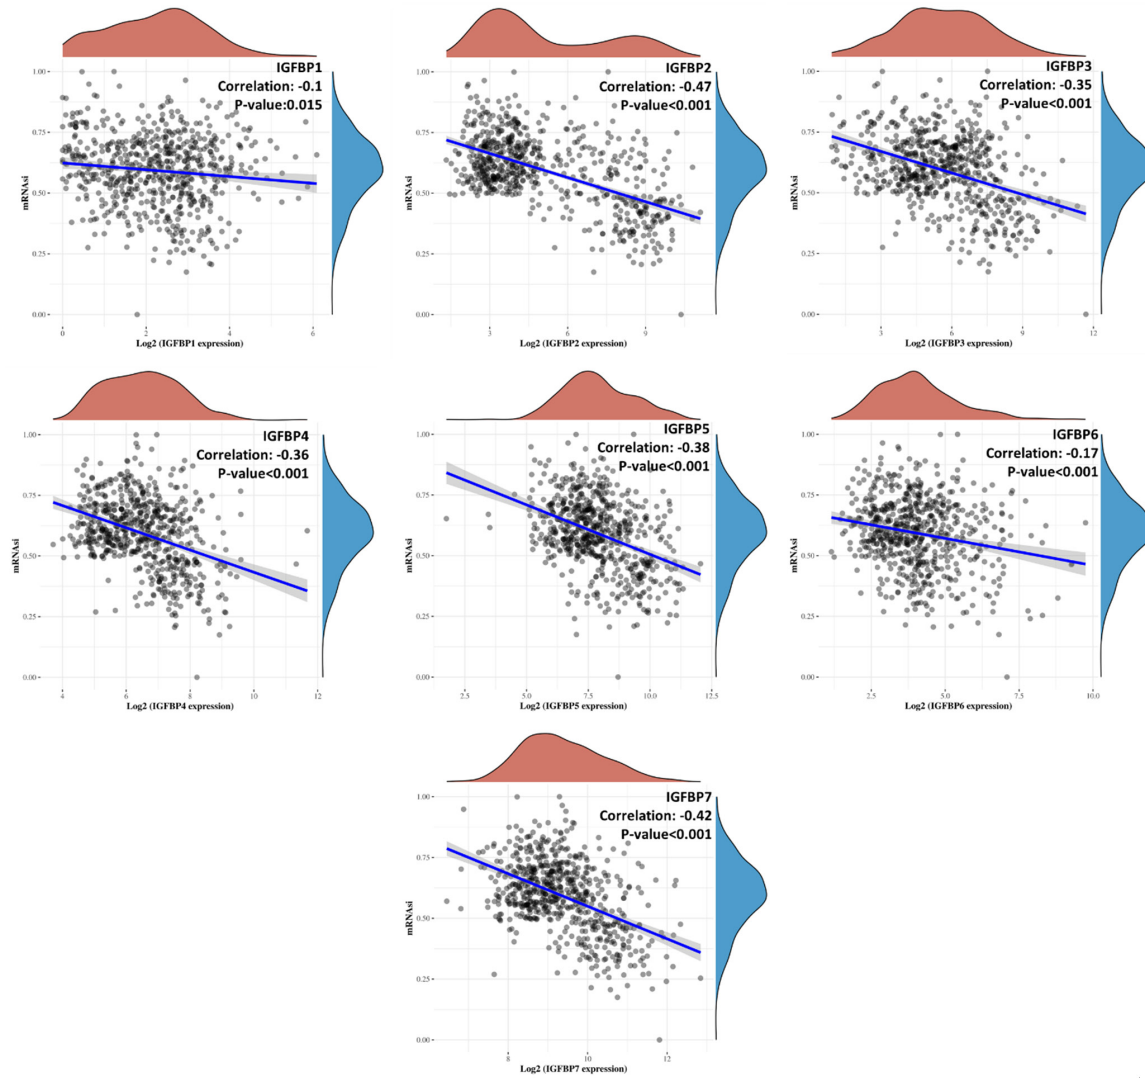

**Supplementary Figure 16.** Correlations of stemness (mRNA<sub>si</sub> score) and mRNA expression of IGFBPs. TCGA (LGG+GBM) mRNA expression cohort was analyzed. The OCLR algorithms were used to estimate the stemness.
